# Supplementary material
Source: PubMed Central journal article supplement (PMC2917617)
Supplement: NIHMS214314-supplement-5.pdf [file NIHMS214314-supplement-5.pdf]

## Supplemental Figure 4

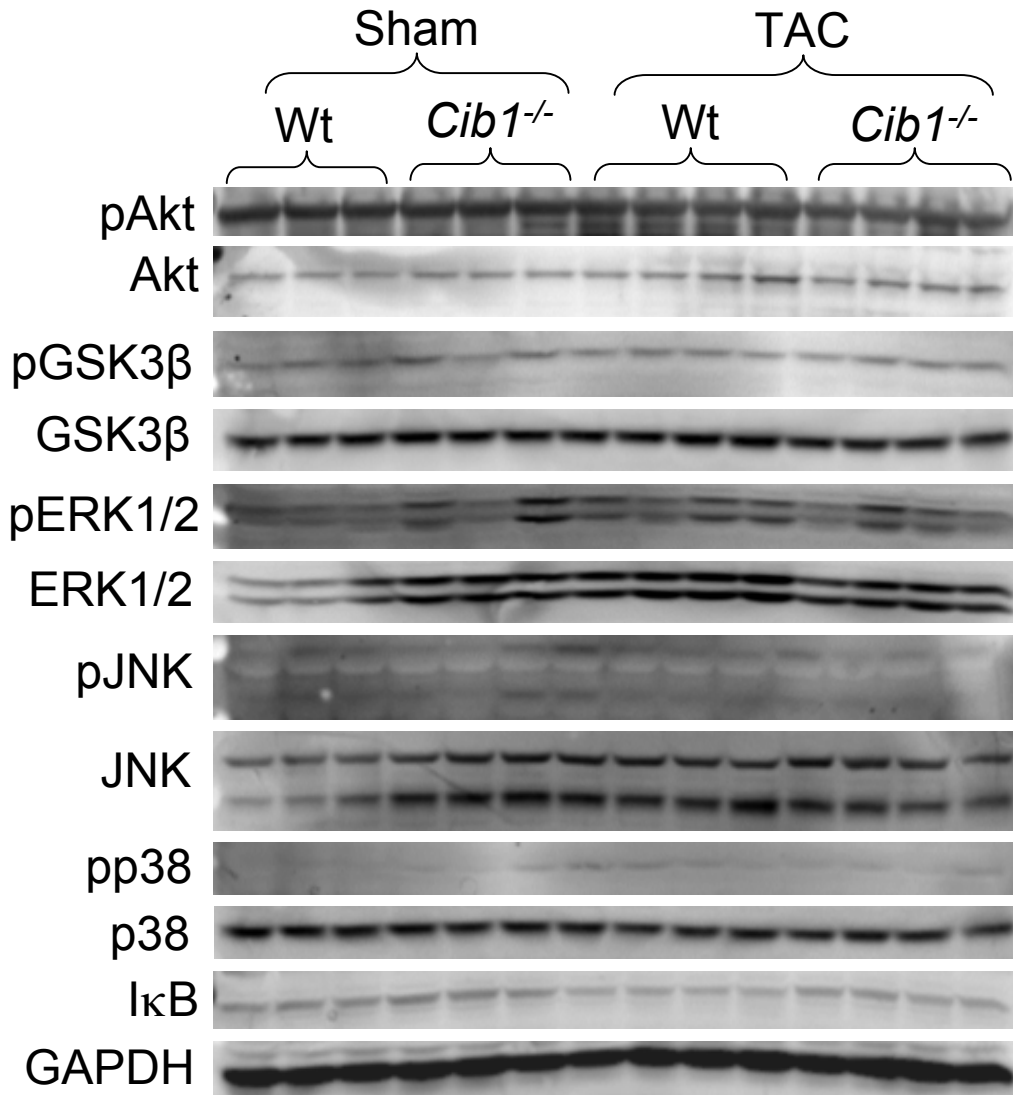

**S. Fig 4.** Immunoblots for the indicated proteins from myocardial lysates from WT or *Cib1*<sup>-/-</sup> mice subjected to sham or TAC for 2 weeks. Abbreviations: pGSK3β, phosphorylated glycogen kinase 3β; pERK1/2, phosphorylated extracellular signal-regulated kinase 1/2; pJNK, phosphorylated c-Jun N-terminal kinase; pp38, phospho-p38.
